# Supplementary material for: ZIF-derived oxygen vacancy-rich Co3O4 for constructing an efficient Z-scheme heterojunction to boost photocatalytic water splitting
Source: Royal Society of Chemistry journal article supplement (doi:10.1039/d3dt03706a), 2024-01-01
Supplement: d3dt03706a1.pdf [file d3dt03706a1.pdf]

## Supporting Information

### ZIF-derived Oxygen Vacancy-rich $\text{Co}_3\text{O}_4$ for Constructing Efficient Z-scheme Heterojunction to Boost Photocatalytic Water Splitting

Susu Han<sup>a,b</sup>, Zejin Wang<sup>a,b</sup>, Wenbo Zhu<sup>a,b</sup>, Huaizhi Yang,<sup>a,b</sup> Le Yang<sup>a,b</sup>, Ying Wang<sup>a,b,\*</sup>, Zhigang Zou<sup>b</sup>

<sup>a</sup> School of Chemistry and Chemical Engineering, Nanjing University, Nanjing, 210023, PR China

<sup>b</sup> Eco-materials and Renewable Energy Research Center (ERERC), National Laboratory of Solid-State Microstructures, Kunshan Innovation Institute of Nanjing University, Jiangsu Key Laboratory for Nanotechnology, Nanjing University, Nanjing, 210023, PR China

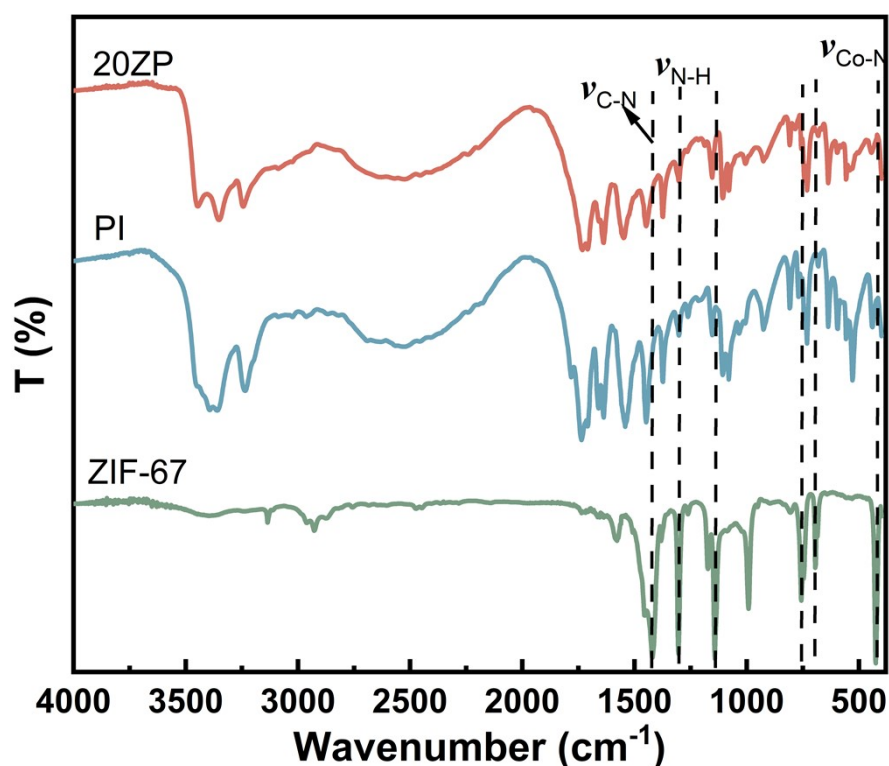

Figure S1. FT-IR spectra of PI, 20ZP and ZIF-67 samples

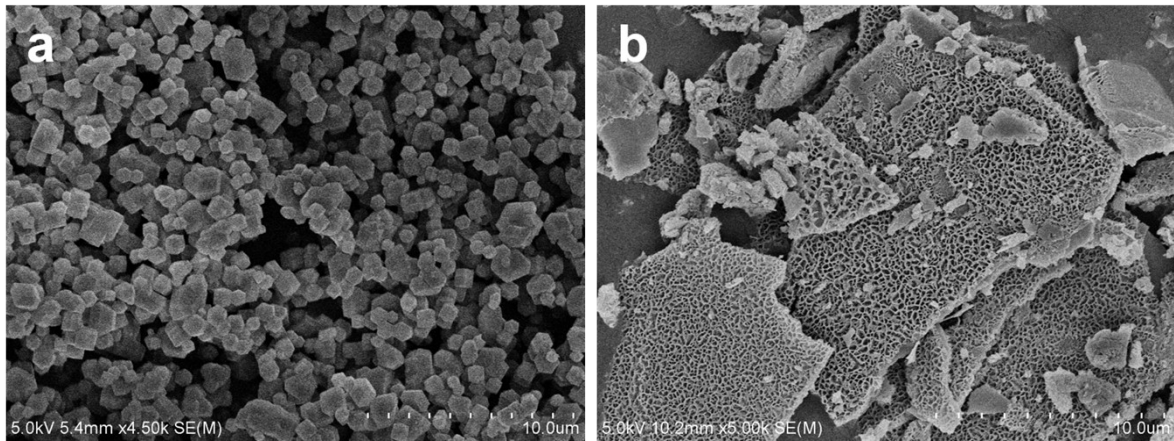

**Figure S2.** SEM images of ZIF-67(a) and 320ZP(b)

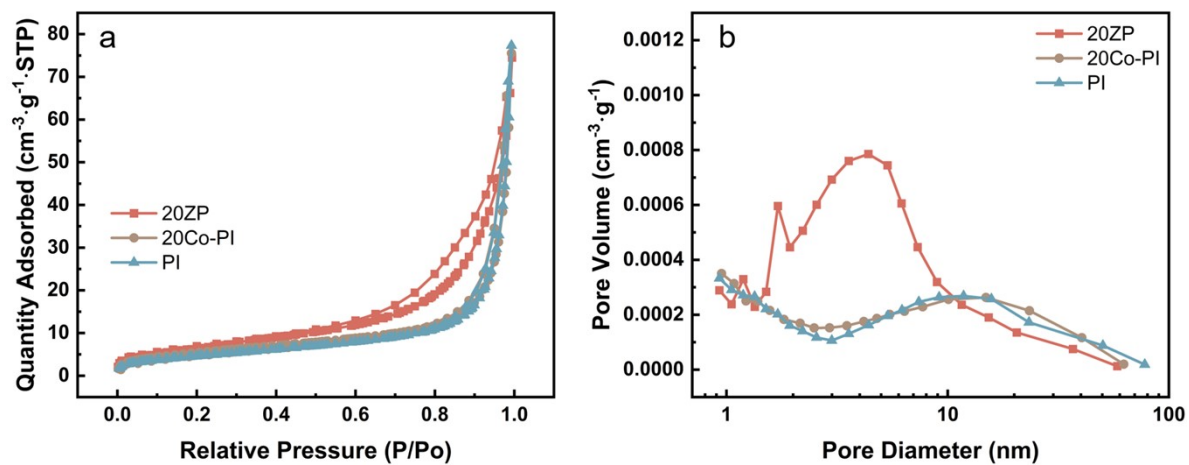

**Figure S3.** N<sub>2</sub> adsorption-desorption isotherm (a) and the pore distribution curves (b) of PI, 20ZP and Co<sup>2+</sup>-PI samples.

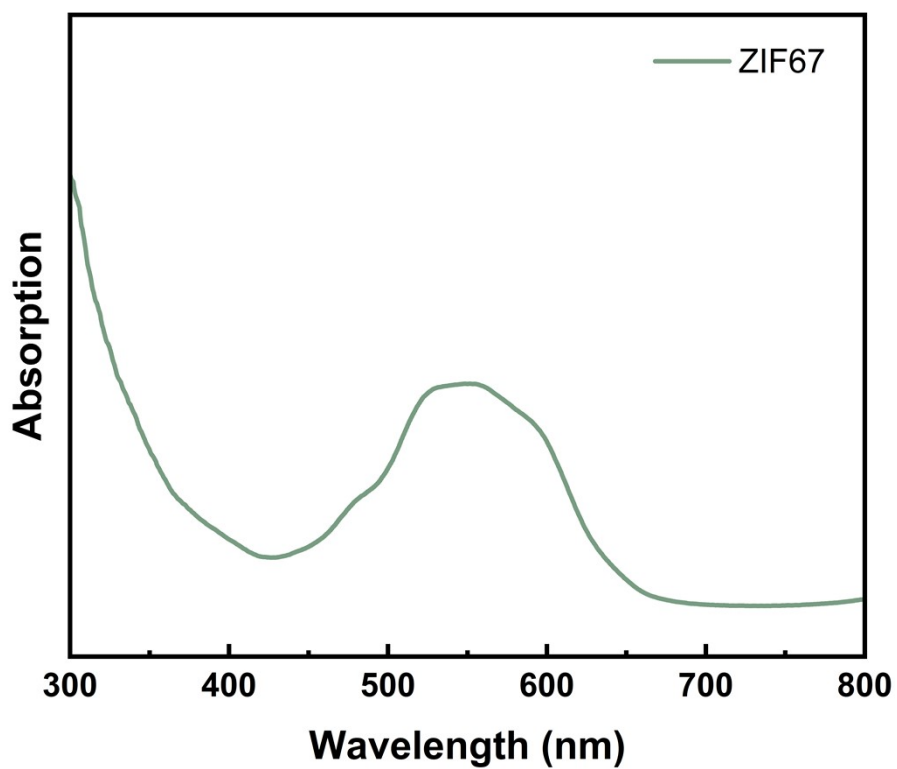

**Figure S4.** UV-vis DRS spectra of ZIF-67 samples.

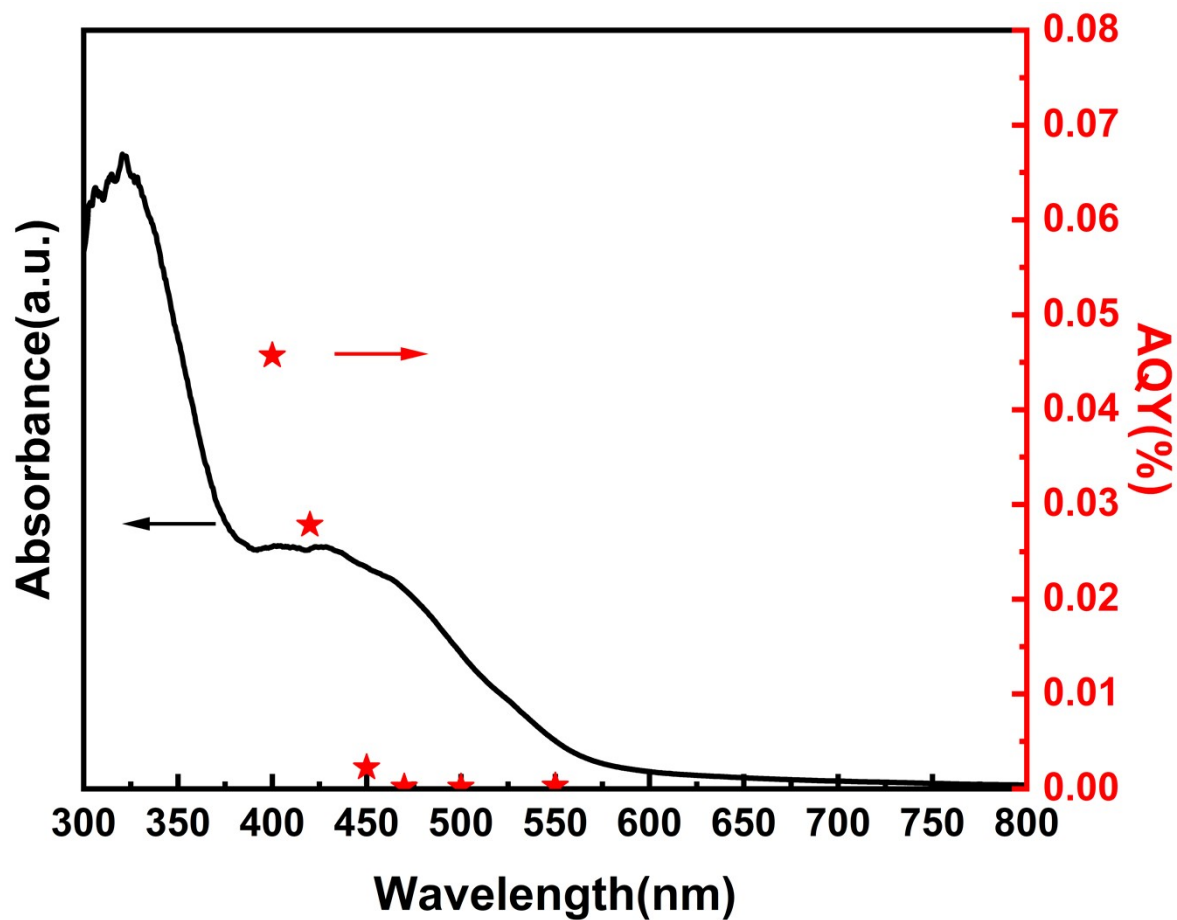

Figure S5. The wavelength dependent AQY of hydrogen evolution over 20ZP.

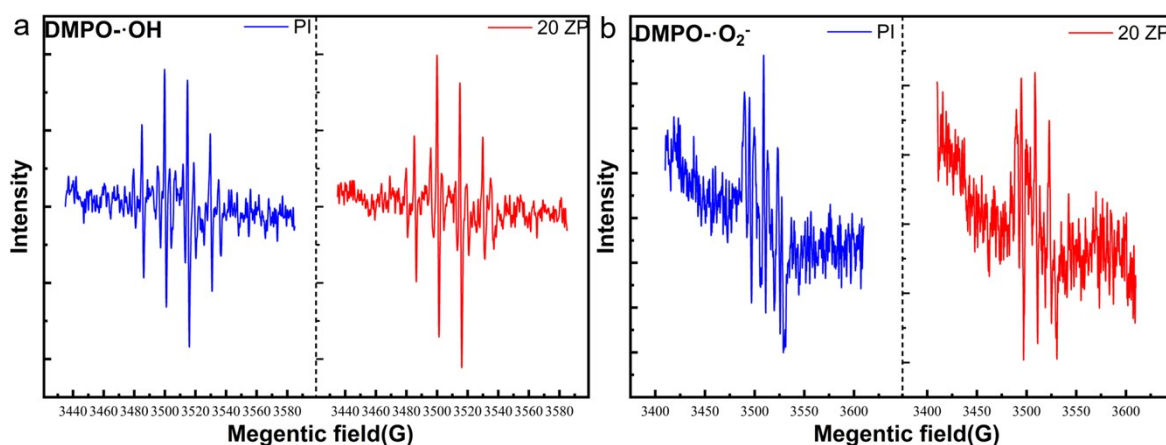

Figure S6. EPR spectra of  $\cdot\text{OH}$  and  $\cdot\text{O}_2^-$  species detected by using DMPO as trapping reagent after light irradiation for 5 min.

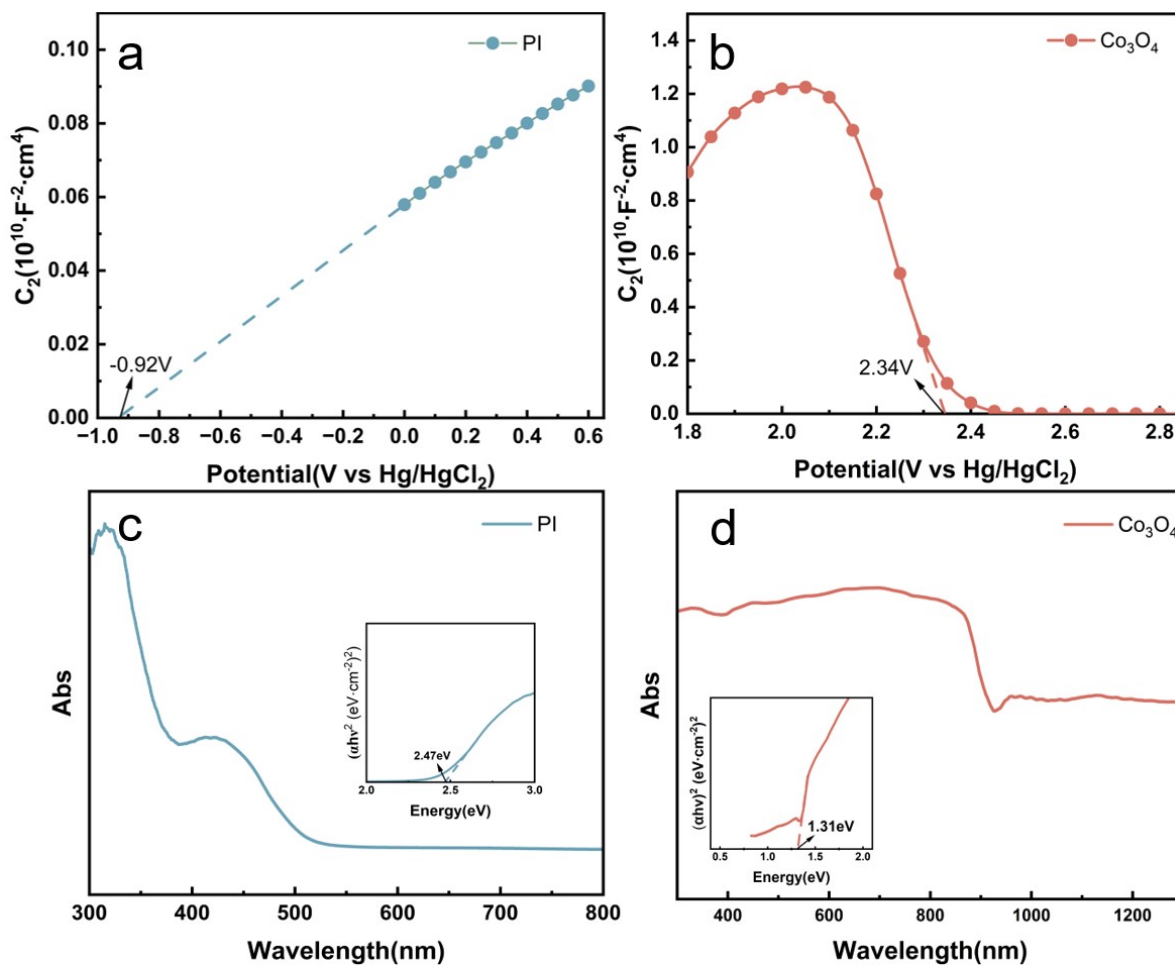

**Figure S7.** Mott-Schottky plots of PI(a) and Co<sub>3</sub>O<sub>4</sub>(b) samples at frequencies 1 kHz, UV-vis DRS spectra and the corresponding plots of  $(\alpha hv)^2$  versus  $h\nu$  of PI(c) and Co<sub>3</sub>O<sub>4</sub>(d) samples.

**Table S1.** Comparison of the H<sub>2</sub>-production rates of PI-based photocatalytic composite photocatalysts for water splitting.

| Sample name | Photocatalyst                                                        | Irradiation source     | Reaction conditions                                                 | Nobel metal cocatalyst | Activity $\mu\text{mol}\cdot\text{g}^{-1}\cdot\text{h}^{-1}$ | Ref       |
|-------------|----------------------------------------------------------------------|------------------------|---------------------------------------------------------------------|------------------------|--------------------------------------------------------------|-----------|
| 1           | PI-TC                                                                | 300W Xe full arc light | 200mg photocatalyst<br>400mL 10vol% methanol aqueous solution       | Pt(1wt%)               | 150                                                          | [1]       |
| 2           | 3.0MoO <sub>3</sub> /PI                                              | 300W Xe full arc light | 20mg photocatalyst<br>400mL 10vol% methanol aqueous solution        | Pt(3wt%)               | 450                                                          | [2]       |
| 3           | 1.0wt% MQDs/PI                                                       | 300W Xe full arc light | 200mg photocatalyst<br>400mL 10vol% methanol aqueous solution       | /                      | 600                                                          | [3]       |
| 4           | 0.5CO/SPI                                                            | 300W Xe full arc light | 50mg photocatalyst<br>100mL 10vol% triethanolamine aqueous solution | Pt(3wt%)               | 127.2                                                        | [4]       |
| 5           | PI                                                                   | 300W Xe full arc light | 50mg photocatalyst<br>100mL 10vol% methanol aqueous solution        | Pt(1wt%)               | 720                                                          | This work |
| 6           | 20ZP                                                                 | 300W Xe full arc light | 50mg photocatalyst<br>100mL 10vol% methanol aqueous solution        | Pt(1wt%)               | 2016                                                         | This work |
| 7           | Co7-NS-CN <sub>570</sub>                                             | 150W Xe                | 50mg photocatalyst<br>120mL 10vol% TEOA aqueous solution            | Pt(1wt%)               | 120                                                          | [5]       |
| 8           | Co <sub>3</sub> O <sub>4</sub> (7)/C <sub>3</sub> N <sub>4</sub> NTs | 300W Xe >420nm         | 40mg photocatalyst<br>40mL 10vol%                                   | /                      | 241.9                                                        | [6]       |

TEA aqueous  
solution

---

- [1] S. Chu, Y. Wang, Y. Guo, P. Zhou, H. Yu, L. Luo, F. Kong and Z. Zou, *Journal of Materials Chemistry*, 2012, **22**.
- [2] C. Ma, J. Zhou, Z. Cui, Y. Wang and Z. Zou, *Solar Energy Materials and Solar Cells*, 2016, **150**, 102-111.
- [3] C. Ma, H. Zhu, J. Zhou, Z. Cui, T. Liu, Y. Wang, Y. Wang and Z. Zou, *Dalton Transactions*, 2017, **46**, 3877-3886.
- [4] D. Zhang, C. Ma, Z. Luo, M. Zhu, B. Li, L. Zhou and G. Zhang, *RSC Advances*, 2023, **13**, 853-865.
- [5] M. Anagnostopoulou, A. Zindrou, T. Cottineau, A. Kafizas, C. Marchal, Y. Deligiannakis, V. Keller and K. C. Christoforidis, *ACS Applied Materials & Interfaces*, 2023, **15**, 6817-6830.
- [6] Y. Zhu, T. Wan, X. Wen, D. Chu and Y. Jiang, *Applied Catalysis B: Environmental*, 2019, **244**, 814-822.
